# Supplementary material for: In Vitro Digestion of Chestnut and Quebracho Tannin Extracts: Antimicrobial Effect, Antioxidant Capacity and Cytomodulatory Activity in Swine Intestinal IPEC-J2 Cells
Source: PubMed Central journal article supplement (PMC7070574; doi:10.3390/ani10020195), 2020-01-23
Supplement: animals-10-00195-s001.pdf [file animals-10-00195-s001.pdf]

**Supplementary Materials:***PCR conditions and gel electrophoresis*

Briefly, DNA was isolated and purified from *E. coli* using the alkaline lysis method [1,2] The PCR primers were chosen from published sequences (Table S1). For F18+ screening, we amplified a fragment of FedF adhesin (more conserved in all antigenic variants); for F4+ screening we amplified the major fimbrial subunit FaeG. The primers were selected in order to have similar melting temperatures which resulted in a product of different sizes that could easily be identified in agarose gel.

**Table S1.** Primer sequences used in the PCR system for identification of *E. coli*. The primers were designed and checked using Vector NTI software (Thermo Fisher Scientific).

|            | Primer sequences (5'-3')          | Target gene | Size (bp) | Acc. Number | Melting Temperature (°C) |
|------------|-----------------------------------|-------------|-----------|-------------|--------------------------|
| F4 (K88)-F | TGGATGACTGGTGATTTC AATGGTTCGG     | faeG        | 792       | AY437806    | 68.7                     |
| F4 (K88)-R | TTAGTAATAAGTTATTGCTACGTT CAGCG    |             |           |             | 64.8                     |
| F18-F      | ATTCTAGTGCGAGTAGTGCTCAAGTC        | fedF        | 453       | DQ91428     | 66.3                     |
| F18-R      | TTTTGCAATCGCAGGAACATAGATTGAA<br>G |             |           |             | 66.2                     |

Each test was performed in a volume of 25 µl containing the following PCR components: dNTP (200 µM), PCR buffer, MgCl<sub>2</sub> (2 mM), each primer set (10 pmol), 1,25U of pfu DNA polymerase (Promega), and DNA template (50 ng). The negative control consisted of 2 µl of water instead of DNA.

PCR amplifications were performed in a thermal cycle (T100 Thermal cycler, BIORAD) under the following conditions: an initial DNA denaturation step at 95 °C for 2 min, followed by 30 cycles beginning with 1 min of denaturation at 95 °C, 1 min for primer annealing at 57 °C, and 2 min of extension at 72 °C. The final extension step was performed at 72 °C for 5 min. The amplified PCR products were analyzed by electrophoresis in agarose gel after staining with Nancy stain (Sigma Aldrich) and visualization in a UV transilluminator (Figure S1).

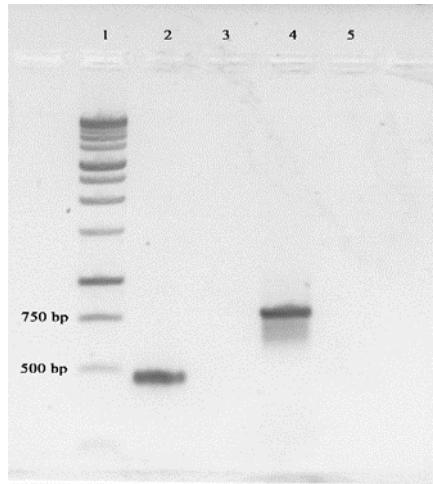

Figure 1. Gel electrophoresis of amplified PCR products.

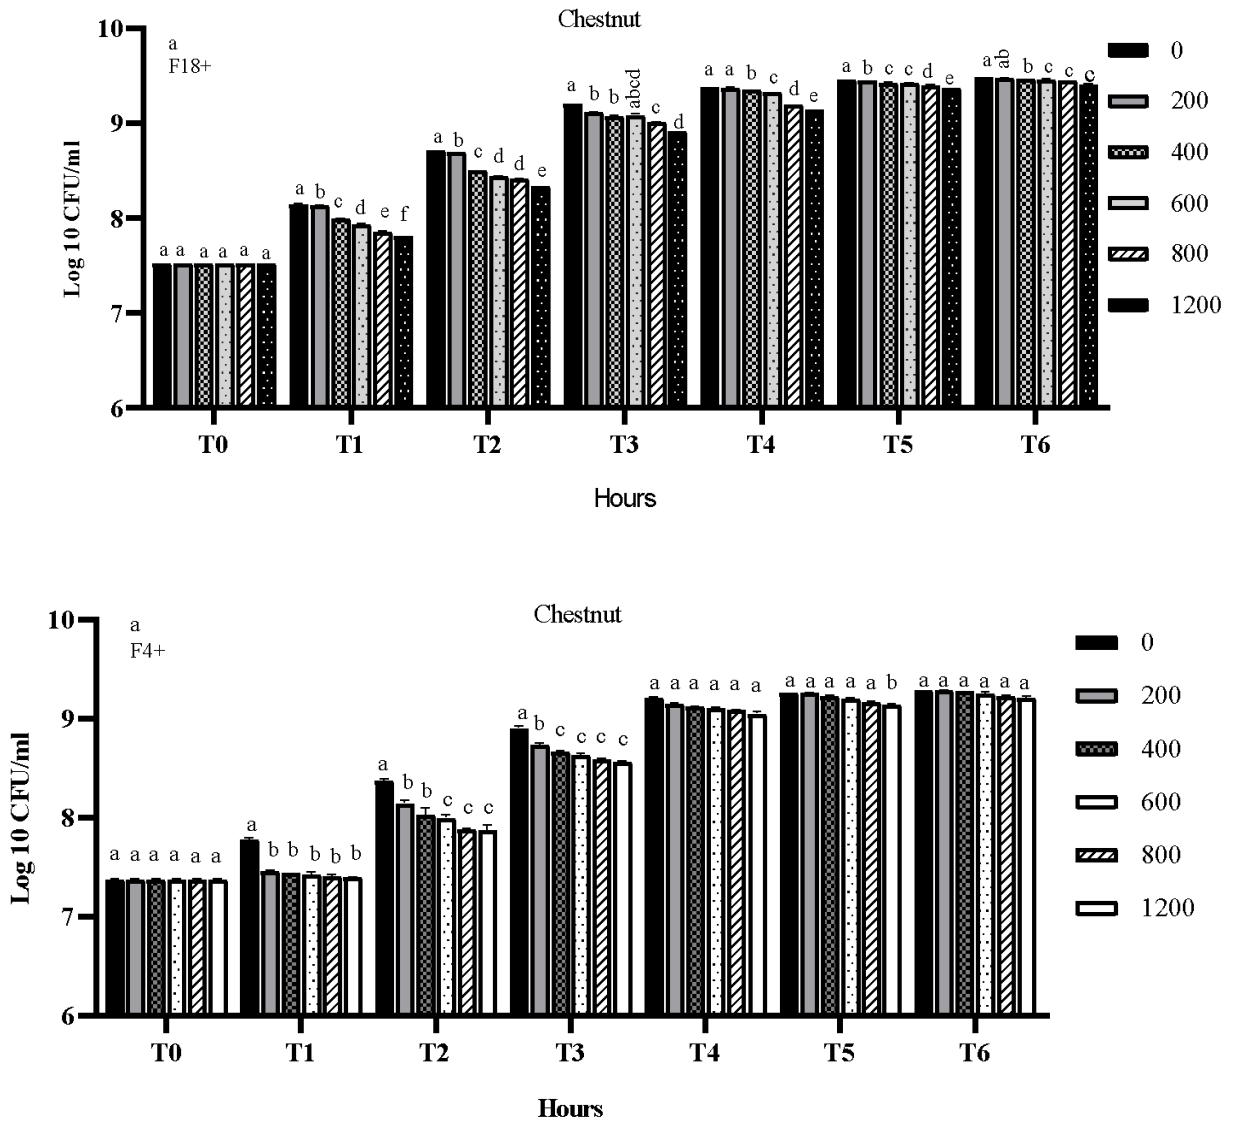

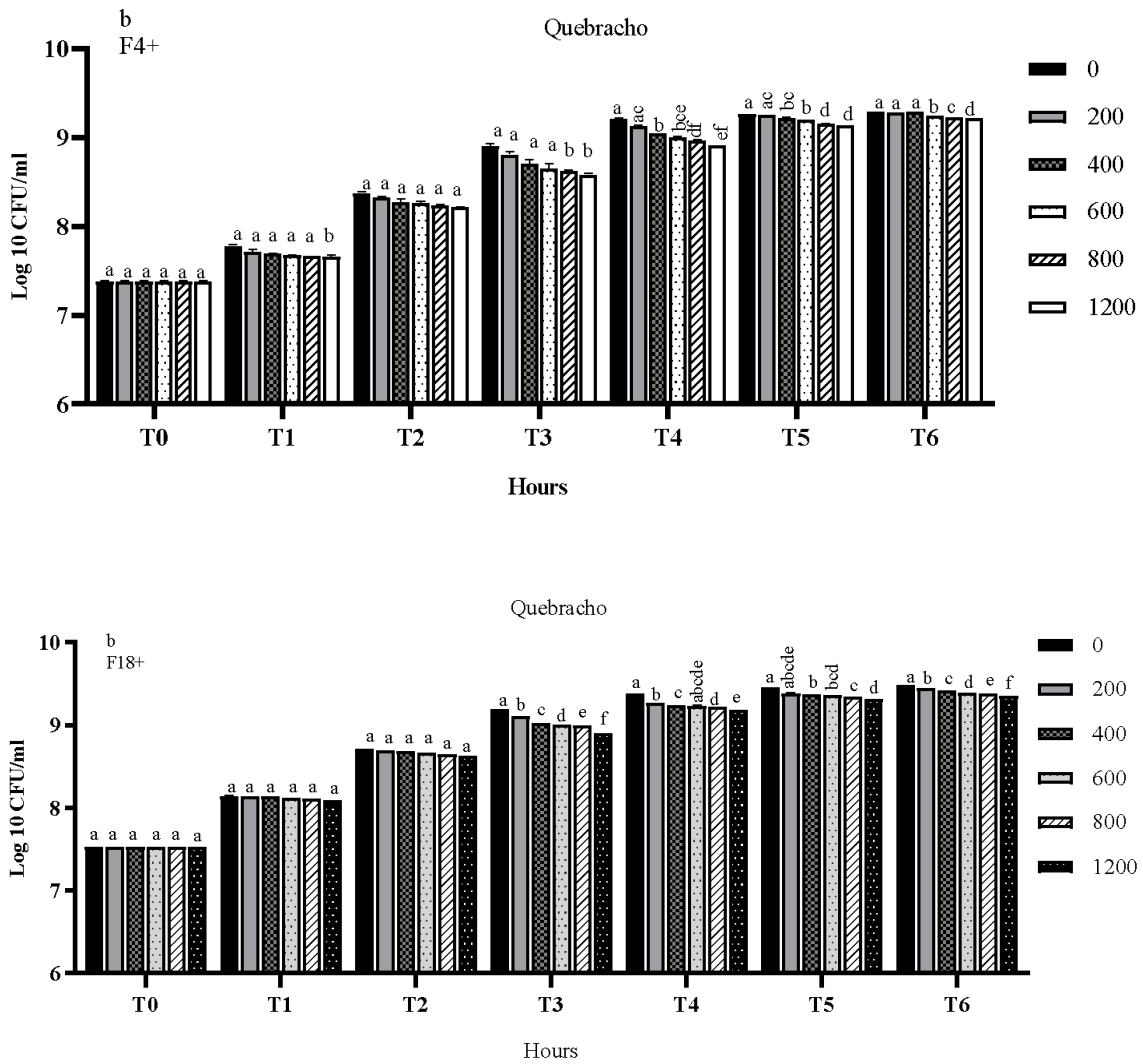

**Figure 2.** Effect of 0–1200 µg/mL of Ch (a) and Qu (b) tannins on *E. coli* F4+ and F18+ growth over time (T). Data are expressed as log<sub>10</sub> CFU/mL  $\pm$  S.E.M. (n = 3). Different superscripts indicate significant differences at p<0.05 among different concentrations within the same time point.

## References

1. Takaiwa, F. Increasing the production yield of recombinant protein in transgenic seeds by expanding the deposition space within the intracellular compartment. *Bioengineered* **2013**, *4*, 136–139.
2. Sambrook, J. *Russell Molecular Cloning: A Laboratory Manual*, 3rd ed.; CSHL: New York, NY, USA, 2001.
